# Supplementary material
Source: PubMed Central journal article supplement (PMC7787931)
Supplement: 10072_2020_4938_MOESM1_ESM.pdf [file 10072_2020_4938_MOESM1_ESM.pdf]

## · 新型冠状病毒肺炎专栏 ·

广东省新型冠状病毒肺炎疫情防控期间脑血管  
病诊断和治疗工作指引<sup>☆</sup>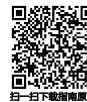

广东省医学会脑血管病学分会和广东省神经内科(脑血管病)医疗质量质控中心

执笔 曾进胜<sup>\*◎</sup> 王丽娟<sup>△</sup> 徐安定 潘速跃<sup>◇</sup> 洪铭范<sup>\*</sup> 唐亚梅<sup>◎</sup> 尹愨<sup>◇</sup> 郭毅<sup>□</sup> 陆正齐<sup>▲</sup>  
范玉华<sup>\*</sup> 邢世会<sup>\*</sup> 任力杰<sup>◆</sup> 彭福华<sup>▲</sup> 庄伟端<sup>\*</sup> 钟望涛<sup>§</sup> 代成波<sup>△</sup>

【摘要】2019年12月以来爆发的新型冠状病毒肺炎(coronavirus disease 2019, COVID-19),具有高传染性和严重致病性,主要发病年龄与脑血管病类似,甚至可表现为急性脑血管病症状,如何做好脑血管病的诊治工作,同时又严格防控疫情,为当前神经科医生面临的严峻新挑战。在广东省医学会和广东省医疗质量控制中心指导下,广东省医学会脑血管病学分会和广东省神经系统疾病(脑血管病)质控中心专家组,参考国内同行经验和相关政策文献,经反复讨论制定本工作指引,包括关注脑血管病合并COVID-19风险、急诊绿色通道管理、溶栓和介入治疗管理、外科手术治疗管理、病房和门诊工作管理、护理管理以及患者和医护人员心里支持等多个方面,供同行在临床工作中参照执行。

【关键词】新型冠状病毒肺炎 急性脑血管病 诊断 治疗 指南

【中图分类号】R743

【文献标识码】A

**Guideline for diagnosis and treatment of cerebrovascular diseases during the corona virus disease 2019 epidemic period in Guangdong Province.** Cerebrovascular Branch of Guangdong Medical Association and the Quality Control Center of Nervous System Disease (Cerebrovascular Diseases) of Guangdong Province. ZENG Jinsheng, Department of Neurology, The First Affiliated Hospital, Sun Yat-sen University; Guangdong Provincial Key Laboratory of Diagnosis and Treatment of Major Neurological Diseases, National Key Clinical Department and Key Discipline of Neurology, Guangzhou, 510080, China. Tel: 020-87755766.

【Abstract】The coronavirus disease 2019 (COVID-19), which outbreaked in December 2019, is highly contagious and severely pathogenic. Given that COVID-19 shares similar average age with acute cerebrovascular diseases and

doi:10.3969/j.issn.1002-0152.2020.02.001

\* 国家重点研发计划项目(编号:2017YFC1307500)

\* 中山大学附属第一医院神经科,广东省重大神经疾病诊治研究重点实验室,国家临床重点专科和重点学科(广州 510080)

△ 广东省人民医院

暨南大学附属第一医院

◇ 南方医科大学南方医院

\* 广东药科大学附属第一医院

◎ 中山大学孙逸仙纪念医院

□ 深圳市人民医院

▲ 中山大学附属第三医院

◆ 深圳市第二人民医院

\* 汕头大学医学院第一附属医院

§ 广东医科大学附属医院

◎ 通信作者(E-mail: zengjs@pub.guangzhou.gd.cn)

can even manifest itself as symptoms of acute cerebrovascular diseases, how to manage the cerebrovascular diseases properly and at the same time strictly prevent and control the epidemic represents a serious new challenge for stroke neurologists. Under the guidance of Guangdong Medical Association and Guangdong Medical Quality Control Center, the experts of the Cerebrovascular Branch of Guangdong Medical Association and the Quality Control Center of Nervous System Disease (Cerebrovascular Diseases) of Guangdong Province formulated this work guideline after a thorough review of available evidence including experience of domestic peers and relevant policy literature of the government and an extensive discussion among experts. The work guideline includes the risk of cerebrovascular diseases combined with COVID-19, the management for emergency medical service, thrombolysis and endovascular therapy, surgical treatment, ward and outpatient work, nursing and psychological supports of patients and medical staff, etc. The aim of the work guideline is to assist medical staffs in the clinical practice during the coronavirus disease outbreak.

**【Key words】** Coronavirus disease 2019 Acute cerebrovascular diseases Diagnosis Treatment Guideline

新型冠状病毒肺炎 (coronavirus disease 2019, COVID-19)已被纳入《中华人民共和国传染病防治法》规定的乙类传染病,并按照甲类传染病进行防控。广东省是我国人口大省,也是外来人口最多、流动人口最频繁的省份,目前已成为除湖北省以外,报告 COVID-19 病例最多、受影响最大和防控任务最艰巨的省份之一。脑血管病多发生在中老年人群,特别是有高血压、糖尿病或心脏疾病患者,而且急性期救治时间窗短暂,争分夺秒,才能提高治疗效益,是广东省成人致死致残的最主要疾病<sup>[1]</sup>。冬春季节是脑血管病的高发季节,而且 COVID-19 患者,如果并发高血压、糖尿病或心脑血管疾病,预后更差,病死率更高<sup>[2]</sup>。为了在防控 COVID-19 同时,保证脑血管病防治工作的高效运转,在广东省医学会和广东省医疗质量控制中心指导下,广东省医学会脑血管病学分会和广东省神经系统疾病(脑血管病)质控中心专家组,参考国内同行经验和相关政策文献,经反复讨论制定本工作指引,供同行在临床工作中参照执行。

## 1 关注脑血管病合并 COVID-19 风险

COVID-19 发病 30~79 岁者占 86.6%,其中有高血压、糖尿病和心血管疾病基础疾病者分别占 2.8%、5.3%和 4.2%,这些患者感染 COVID-19 后病死率显著增高<sup>[2]</sup>。COVID-19 主要发病年龄与脑血管病的好发年龄基本一致,患者伴发的基础疾病又是脑血管病主要危险因素。新近报告,重症 COVID-19 患者可有急性脑血管疾病表现<sup>[3]</sup>。因此,神经科医生在临床工作中必须高度重视脑血管病

患者可能合并 COVID-19 的风险。

① 脑血管病患者就诊时,接诊医生必须高度重视患者及其家属的流行病学接触史。

② 就诊前 14 d 内至就诊时,有明确发热(体温 $\geq 37.3^{\circ}\text{C}$ )、咽痛、咳嗽、气促等呼吸系统相关症状者,必须先引导至发热门诊就诊。

③ 就诊时表现为头晕、头痛、气促、四肢肌肉酸痛或腹痛、腹泻症状的患者,也应做 COVID-19 排查。

④ 部分 COVID-19 者可能无呼吸道或消化道症状,甚至无发热,或者感染后处于潜伏期,但具传染性<sup>[4]</sup>,因此,对仅有脑血管病表现的患者,仍需高度警惕 COVID-19 的风险。

总之,COVID-19 传染性强,早期症状不典型,容易形成院内感染和交叉感染,合并脑血管病时易被忽视,而脑血管病患者一旦罹患 COVID-19,病情进展迅速,可能发展成为重症或危重症 COVID-19。因此,必须高度警惕。

## 2 急诊绿色通道管理

① 将神经科绿色通道及神经科急诊通道(包括诊室、CT/MRI 室、介入手术室等)与发热门诊严格分开,确保与发热患者无任何交叉。

② 所有脑血管病就诊患者需经预检分诊后方可挂号。患者及家属应佩戴口罩。对于病情危重、言语障碍或不能配合的患者,向家属询问居留史、接触史,并让患者和家属书面签署疫情防控告知书。

③ 所有就诊的脑血管病患者就诊前必须认真

筛查COVID-19风险。对有流行病学接触史,或有明确发热(体温 $\geq 37.3^{\circ}\text{C}$ )和呼吸系统相关症状者,按疑似感染者处理;其他患者,也应注意COVID-19排查,并认真做好防护工作。

④ 建议脑血管病患者就诊时,应检测外周白细胞总数、淋巴细胞计数、肝酶、肌酶和C反应蛋白。

⑤ 建议患者行脑部影像学检查同时完成胸部CT平扫,并注意胸部CT是否有COVID-19的表现。

⑥ 患者就诊时应做咽拭子COVID-19核酸检测,但一次检测结果阴性尚不能排除COVID-19。

⑦ 基本排除COVID-19后,按照卒中绿色通道/急诊工作流程安排救治。

⑧ 疑似COVID-19者,安排专门医护人员做好防护措施,陪同患者到发热门诊。

⑨ 确诊病例收入定点医院感染科隔离病房,同时安排神经科专科医师定期到隔离病房查房。

⑩ 各医院结合本医院实际,根据CT室环境、设备配置等情况,制定特定消毒、隔离措施;有条件者设置专用疑似新型冠状病毒肺炎患者CT检查室,能同时完成头颅和胸部CT,必要时开展头颈血管CTA、CTP检查。

⑪ 拟接受溶栓、取栓治疗的脑血管病患者,应尽可能减少排查COVID-19导致的院内延误时间。

### 3 溶栓和介入治疗管理

① 疫情期间,总体上对所有在治疗时间窗内的急性缺血性脑血管病患者,优先推荐静脉溶栓治疗,创造条件在具备隔离设施的单间进行,医护人员注意隔离防护。

② 排除COVID-19后的急性缺血性脑血管病患者,符合血管内介入治疗适应证,溶栓后桥接血管内介入治疗。

③ 疑似COVID-19的急性缺血性脑血管病患者,启动静脉溶栓治疗后,安排专门医护人员做好防护措施,陪同患者到发热门诊。排除COVID-19后,可按需要桥接血管内介入治疗。未排除

COVID-19者,如紧急情况下须急诊介入治疗,应充分知情同意后,在严格隔离条件达标的负压手术间施行手术。

④ 确诊COVID-19的急性缺血性脑血管病患者,严格隔离条件下静脉溶栓后,转运至定点医院隔离病房治疗,不推荐防护条件不达标情况下,进行急诊介入治疗。如确需急诊介入手术,应充分知情同意后,在符合严格隔离条件的负压手术间开展。

⑤ 对疑似/确诊患者施行手术的人员必须采用三级防护措施,患者应戴外科口罩,术后手术间严格消毒。

⑥ 疫情期间医护人员接触脑血管病患者后应密切监测,避免交叉感染风险。意外接触过疑似/确诊患者的手术人员,按密切接触者严格隔离处理。

### 4 外科手术治疗管理

① 不建议疫情期间开展脑血管病并COVID-19风险患者的择期手术。

② 对危及生命的急性脑血管病,可参考血管再通治疗的病例筛选方案,排除COVID-19者,按常规手术管理处理。疑似者须排查COVID-19,紧急情况下,应在隔离条件达标的负压手术间施行手术。确诊COVID-19患者,应在定点医院隔离病房治疗,手术治疗须在隔离条件达标的负压手术间施行。

③ 手术人员必须采用三级防护措施,患者应佩戴医用外科口罩,术后手术间严格消毒。

### 5 病房工作管理

① 不建议非紧急病情的脑血管病患者,在疫情期间住院查病因或做择期治疗。

② 患者应在指定观察区等候排除COVID-19,每天监测体温,体温正常、血常规、胸部CT及新型冠状病毒核酸检测结果阴性,排除COVID-19后才能进入普通脑血管病房。

③ 由于部分新型冠状病毒感染者无呼吸系统症状,甚至核酸检测结果为阴性,接诊新入院患者

时,必须提高警惕,按照要求做好医务人员的自身防护工作。

④ 再次认真追问新入院患者和家属的流行病学接触史,强调隐瞒病史的法律责任,并签署书面责任书。

⑤ 再次认真询问有无呼吸道症状或发热病史;并核查血常规、胸部 CT 和新型冠状病毒核酸检测结果。

⑥ 必要时再次做咽拭子取样,送新型冠状病毒核酸检测。

⑦ 有条件时,固定陪护人员也应作新型冠状病毒感染排查。

⑧ 检查患者前后清洁洗手。

⑨ 病区尽量创造条件设立新收患者独立病房,在独立病房观察 3~7 d,并确认排除 COVID-19 后,再转普通病房。

⑩ 排除 COVID-19 后,方可开展床边早期康复治疗。

⑪ 如发现疑似 COVID-19 患者,请医院专家组会诊;确诊患者,转定点医院专科治疗。

⑫ 若收治了合并 COVID-19 患者,应按要求实行严格隔离和环境消毒。

⑬ 医护人员下班后做好个人消毒防护工作。

## 6 门诊工作管理

① 保证候诊室及就诊室室内空气流通,消毒措施和间隔严格按照《医院空气净化管理规范(WS/T368—2012)》<sup>[5]</sup>进行;人间距在 1.5 m 以上,家属尽量在诊室外等候。

② 医护人员熟练掌握 COVID-19 相关知识与防护技能;开展诊疗工作应当执行现行国家防控标准<sup>[6]</sup>。工作前接受体温测量,日常诊疗活动中可采用一级防护。与高风险/潜伏期病人密切接触时及接诊时,采用二级或三级防护。做好手卫生,严格按照《医务人员手卫生规范》执行,不要随意触摸眼睛和鼻粘膜。

③ 工作全程防护,接诊每例患者前消毒诊查工具;发现疑似或确诊病例后冷静退出诊室,提升防护级别,患者就地隔离并报告相关部门。

④ 广泛宣传,减少人员流动;无紧急就诊要求的患者暂缓来院就诊,建议电话或网络方式进行随诊。

⑤ 远程会诊指导下级医院或定点医院的急性脑血管病救治。

⑥ 就诊患者及家属需佩戴口罩,配合测量体温,如实提供有无去过疫区及患者或高危人群接触史。

⑦ 就诊前分诊护士测量体温及详细询问病史(流行病学、呼吸道等症状),填写《新型冠状病毒感染流行病学筛查表》,并签名。体温 $<37.3^{\circ}\text{C}$ 及无相关病史者可在专科门诊就诊; $\geq 37.3^{\circ}\text{C}$ 或有相关病史者转至发热门诊就诊;如为危重症患者无法转至发热门诊者,应启动院内会诊,排除 COVID-19 则按专科常规诊治,否则按疑似或确诊 COVID-19 合并脑血管病患者处理。

⑧ 排除 COVID-19 的脑血管病患者按常规诊治流程诊治;危重症患者,可收住院并按病房工作管理进行相关治疗;脑血管病超急性期的患者建议按本指引的急诊绿色通道管理处理。

⑨ 疑似或确诊 COVID-19 合并脑血管病患者,提升防护至隔离病区防护级别,患者就地隔离,立即上报相关部门转送定点医院诊治。

## 7 患者心理干预管理

① 必须高度重视 COVID-19 患者的心理应激反应,脑血管病本身也常合并心理应激症状,给神经科医生临床管理增加难度。

② 及时识别脑血管病合并 COVID-19 患者的精神心理障碍,可采用相关量表评估心理状态、认知状况、情绪反应和行为变化。

③ 给予心理调适干预措施,提供恰当情感支持、信息支持,消除不确定感和焦虑情绪。

④ 必要时加用药物干预,如抗焦虑、抗抑郁、抗精神病等药物。

⑤ 症状严重患者,出现自杀倾向、躁狂等明显精神症状时,请精神科进一步治疗。

## 8 护理管理

① 高度警惕脑血管病合并 COVID-19 的风险,做好患者和医护人员的隔离防护工作。

② 科学合理平衡常规任务与疫情紧急救治任务的人力需求。

③ 根据疫情发展和护士的数量、结构、身心负荷,及时调整排班。

④ 脑血管病病房按二级防护准备物资,包括有工作服、工作帽、医用防护口罩、一次性隔离衣、护目镜/面屏、乳胶手套。保障防护物资按需分配,专人管理,定点放置<sup>[7]</sup>。

⑤ 兼顾效率,在保证质量与安全的前提下实现护理人力使用效率的最大化。

## 9 医护人员心理支持

① 认识了解 COVID-19 是可防可控的疾病,克服心理障碍,认真做好诊治脑血管病过程中的自身防护工作。

② 科室组建心理援助小组,及时识别心理障碍高危人群,关注在疫情防控一线医护人员,可用相关心理评估量表评估医护人员的心理状态。

③ 对出现心理问题医护人员,及时进行心理疏导及药物干预,向上级汇报处理,避免极端事件的发生,如自杀、冲动行为等<sup>[8]</sup>。

④ 必要时请心理精神科医师协助,采取及时有效的心理干预,帮助医护人员度过心理危机<sup>[8]</sup>。

⑤ 关心、帮助临床一线医护人员的生活,并解决其后顾之忧。

总之,COVID-19 疫情期间,必须全程、全方位高度重视医护人员和脑血管病患者的防护。如何保证脑血管病防治工作的高效运转,同时又能做好严格的疫情防控,是我们面临的全新挑战。相信经全体同行努力,一定能在这场史无前例的战役中取得全面胜利。

编写组组长 曾进胜(中山大学附属第一医院)

编写组副组长 王丽娟(广东省人民医院),徐安定(暨南大学附属第一医院),潘速跃(南方医科大学南方医院),陆正齐(中山大学附属第三医院),洪铭范(广东药科大学附属第一医院),彭福华(中山大学附属第三医院),唐

亚梅(中山大学孙逸仙纪念医院),尹愨(南方医科大学南方医院),郭毅(深圳市人民医院),钟望涛(广东医科大学附属医院),高庆春(广州医科大学附属第二医院),黄立安(暨南大学附属第一医院),范玉华(中山大学附属第一医院)

编写组成员 曾进胜(中山大学附属第一医院),王丽娟(广东省人民医院),徐安定(暨南大学附属第一医院),潘速跃(南方医科大学南方医院),陆正齐(中山大学附属第三医院),洪铭范(广东药科大学附属第一医院),唐亚梅(中山大学孙逸仙纪念医院),尹愨(南方医科大学南方医院),彭福华(中山大学附属第三医院),刘亚杰(南方医科大学深圳医院),郭毅(深圳市人民医院),范玉华(中山大学附属第一医院),钟望涛(广东医科大学附属医院),高庆春(广州医科大学附属第二医院),黄立安(暨南大学附属第一医院),庄伟端(汕头大学医学院第一附属医院),邢世会(中山大学附属第一医院),任力杰(深圳市第二人民医院),代成波(广东省人民医院),吴文军(中山市人民医院),陈仰昆(东莞市人民医院),邓伟华(广州市第一人民医院),张素平(广州市红十字会医院),刘雁(南部战区广州总医院),卓文燕(珠海市人民医院),王玉凯(佛山市第一人民医院),黎宏庄(南方医科大学顺德医院),黎冠东(江门市中心医院),王定佑(韶关市粤北人民医院),党超(中山大学附属第一医院),李晓彪(广东省医学会)(排名不分先后)

## 参 考 文 献

- [1] 黎建乐,王莹,冯慧宇,等.广东省脑卒中流行病学调查[J].中国神经精神疾病杂志,2020,46(1):1-7.
- [2] DENG SQ, PENG HJ. Characteristics of and Public Health Responses to the Coronavirus Disease 2019 Outbreak in China[J]. J Clin Med, 2020, 9(2): E575.
- [3] MAO L, WANG M, CHEN S, et al. Neurological manifestations of hospitalized patients with COVID-19 in Wuhan, China: a retrospective case series study [J/OL]. MedRxiv (2020-02-25 [2020-02-27]. <http://dx.doi.org/10.1101/2020.02.22.20026500>.
- [4] BAI Y, YAO L, WEI T, et al. Presumed Asymptomatic Carrier Transmission of COVID-19[J]. JAMA, Published online February 21, 2020.doi:10.1001/jama.2020.2565
- [5] 中华人民共和国国家卫生健康委员会. WS/T 368-2012 医院空气净化管理规范 [EB/OL]. (2012-4-17)[2020-02-27]. <http://www.nhc.gov.cn/fzs/s7852d/201204/2a75e255894a4b28827bb996def3cf02.shtml>.

- [6] 中华人民共和国国家卫生健康委员会. 新型冠状病毒感染的肺炎诊疗方案(试行第六版)[EB/OL]. (2020-02-18) [2020-02-27]. <http://www.nhc.gov.cn/yzygj/s7653p/2020028334a326dd94d329df351d7da8aefc2/files/b218cfcb1bc54639af227f922bf6b817.pdf>.
- [7] 中华人民共和国国家卫生健康委员会. 国家卫生健康委办公厅关于印发新型冠状病毒感染的肺炎防控中常见医用防护用品使用范围指引(试行)的通知[EB/OL]. (2020-01-26) [2020-02-27]. <http://www.nhc.gov.cn/yzygj/s7659/202001/e71c5de925a64eafbe1ce790debab5c6.shtml>.
- [8] 中华人民共和国国家卫生健康委员会. 新型冠状病毒感染的肺炎疫情紧急心理危机干预指导原则[EB/OL]. (2020-01-26) [2020-02-27]. <http://www.nhc.gov.cn/jkj/s3577/202001/6adc08b966594253b2b791be5c3b9467.shtml>.

(收稿日期:2020-02-22)

(责任编辑:李立)
